# Supplementary material for: Synthetic Cinnamides and Cinnamates: Antimicrobial Activity, Mechanism of Action, and In Silico Study
Source: MDPI journal article supplement (doi:10.3390/molecules28041918), 2023-02-17
Supplement: s1 [file s1]

# Synthetic Cinnamides and Cinnamates: Antimicrobial Activity, Mechanism of Action, and *In Silico* Study

Mayara Castro de Moraes <sup>1</sup>, Edeltrudes de Oliveira Lima <sup>1</sup>, Yunierkis Perez-Castillo <sup>2</sup> and  
Damião Pergentino de Sousa <sup>1,3,\*</sup>

<sup>1</sup> Department of Pharmaceutical Sciences, Federal University of Paraíba, João Pessoa 58051-900, PB, Brazil

<sup>2</sup> Bio-cheminformatics Research Group and Area de Ciencias Aplicadas, Facultad de Ingeniería y Ciencias Aplicadas, Universidad de Las Americas, Quito 170503, Ecuador

<sup>3</sup> Postgraduate Program in Bioactive Natural and Synthetic Products, Federal University of Paraíba, João Pessoa 58051-900, PB, Brazil

\* Correspondence: damiao\_desousa@yahoo.com.br

## 1. Experimental

### 1.1 Chemical characterization of compounds 2–20.

*Methyl cinnamate* (2): Amber amorphous solid; Yield 87.4% (239.3 mg, 1.47 mmol); C<sub>10</sub>H<sub>10</sub>O<sub>2</sub>; 162.19 g/mol; m.p.: 31–33°C <sup>[1]</sup>; TLC (hexane); R<sub>f</sub> = 0.20; IR ν<sub>max</sub> (KBr, cm<sup>-1</sup>): 3063, 3030, 2946, 1710, 1639, 1579, 1450, 1309, 1176; <sup>1</sup>H-NMR (CDCl<sub>3</sub>, 200 MHz): δ<sub>H</sub> 7.65 (1H; *d*; J = 16.0 Hz), 7.46–7.45 (2H; *m*), 7.33–7.31 (3H; *m*), 6.41 (1H; *d*; J = 16.0 Hz), 3.75 (3H; *s*); <sup>13</sup>C-NMR (CDCl<sub>3</sub>, 100 MHz): δ<sub>C</sub> 167.31 (C=O), 144.81 (C-7), 134.37 (C-1), 130.27 (C-4), 128.86 (C-3, C-5), 128.07 (C-2, C-6), 117.80 (C-8), 51.59 (C-1') <sup>[1]</sup>.

*Ethyl cinnamate* (3): Yellow oil; Yield 90.7% (269.53 mg, 1.52 mmol); C<sub>11</sub>H<sub>12</sub>O<sub>2</sub>; 176.22 g/mol; TLC (hexane); R<sub>f</sub> = 0.22; IR ν<sub>max</sub> (KBr, cm<sup>-1</sup>): 3067, 3032, 2930, 1715, 1638, 1578, 1451, 1312, 1173, 768; <sup>1</sup>H-NMR (CDCl<sub>3</sub>, 500 MHz): δ<sub>H</sub> 7.67 (1H; *d*; J = 16.5 Hz), 7.46–7.45 (2H; *m*), 7.32–7.30 (3H; *m*), 6.42 (1H; *d*; J = 16.5 Hz), 4.23 (2H; *q*; J = 7.0 Hz), 1.34 (3H; *t*; J = 7.0 Hz); <sup>13</sup>C-NMR (CDCl<sub>3</sub>, 100 MHz): δ<sub>C</sub> 166.83 (C=O), 144.81 (C-7), 134.43 (C-1), 130.17 (C-4), 128.82 (C-3, C-5), 128.02 (C-2, C-6), 118.24 (C-8), 60.38 (C-1'), 106.14 (C-2') <sup>[1]</sup>.

*Propyl cinnamate* (4): Yellow oil; Yield 90.7% (144.4 mg, 0.78 mmol); C<sub>12</sub>H<sub>14</sub>O<sub>2</sub>; 190.24 g/mol; TLC (hexane); R<sub>f</sub> = 0.28; IR ν<sub>max</sub> (KBr, cm<sup>-1</sup>): 3064, 3032, 2969, 1714, 1639, 1579, 1450, 1313, 1174, 768; <sup>1</sup>H-NMR (CDCl<sub>3</sub>, 500 MHz): δ<sub>H</sub> 7.69 (1H; *d*; J = 16.0 Hz), 7.53–7.51 (2H; *m*), 7.38–7.37 (3H; *m*), 6.45 (1H; *d*; J = 16.0 Hz), 4.16 (2H; *t*; J = 7.0 Hz), 1.73 (2H; *sex*; J = 7.0 Hz), 0.99 (3H; *t*; J = 7.5 Hz); <sup>13</sup>C-NMR (CDCl<sub>3</sub>, 125 MHz): δ<sub>C</sub> 167.07 (C=O), 144.58 (C-7), 134.51 (C-1), 130.22 (C-4), 128.89 (C-3, C-5), 128.07 (C-2, C-6), 118.31 (C-8), 66.14 (C-1'), 22.13 (C-2'), 10.47 (C-3') <sup>[1, 2]</sup>.

*Isopropyl cinnamate* (5): Yellow oil; Yield 83.1% (133.3 mg, 0.70 mmol); C<sub>12</sub>H<sub>14</sub>O<sub>2</sub>; 190.24 g/mol; TLC (hexane); R<sub>f</sub> = 0.34; IR ν<sub>max</sub> (KBr, cm<sup>-1</sup>): 3063, 2981, 1710, 1639, 1579, 1450, 1309, 1176, 768; <sup>1</sup>H-NMR (CDCl<sub>3</sub>, 500 MHz): δ<sub>H</sub> 7.64 (1H; *d*; J = 16.0 Hz), 7.44–7.42 (2H; *m*), 7.30–7.28 (3H; *m*), 6.37 (1H; *d*; J = 16.0 Hz), 5.10 (1H; *septet*; J = 6.0 Hz), 1.26 (6H; *d*; J = 6.0 Hz); <sup>13</sup>C-NMR (CDCl<sub>3</sub>, 125 MHz): δ<sub>C</sub> 166.16 (C=O), 144.06 (C-7), 134.35 (C-1), 129.93 (C-4), 128.66 (C-3, C-5), 127.82 (C-2, C-6), 118.62 (C-8), 67.32 (C-1'), 21.74 (C-2') <sup>[1–3]</sup>.

*Butyl cinnamate* (6): Yellow oil; Yield 89.3% (153.8 mg, 0.75 mmol); C<sub>13</sub>H<sub>16</sub>O<sub>2</sub>; 204.27 g/mol; TLC (hexane); R<sub>f</sub> = 0.2; IR ν<sub>max</sub> (KBr, cm<sup>-1</sup>): 3063, 3030, 2961, 1714, 1639, 1579, 1451, 1311, 1172, 768; <sup>1</sup>H-NMR (CDCl<sub>3</sub>, 400 MHz): δ<sub>H</sub> 7.69 (1H; *d*; J = 16.0 Hz), 7.53–7.51 (2H; *m*), 7.39–7.37 (3H; *m*), 6.44 (1H; *d*; J = 16.0 Hz), 4.21 (2H; *t*; J = 6.8 Hz), 1.70 (2H; *q*; J = 6.8 Hz), 1.44 (2H; *J* = 7.2 Hz), 0.97 (3H; *t*; J = 7.2 Hz); <sup>13</sup>C-NMR (CDCl<sub>3</sub>, 100 MHz): δ<sub>C</sub> 167.12 (C=O), 144.57 (C-7), 134.50 (C-1), 130.21

(C-4), 128.88 (C-3, C-5), 128.06 (C-2, C-6), 118.32 (C-8), 64.45 (C-1'), 30.80 (C-2'), 19.22 (C-3'), 13.76 (C-4')<sup>[1,3]</sup>.

*Pentyl cinnamate* (**7**): Yellow oil; Yield 68.9% (126.9 mg, 0.58 mmol); C<sub>14</sub>H<sub>18</sub>O<sub>2</sub>; 218.30 g/mol; TLC (hexane); R<sub>f</sub> = 0.22; IR ν<sub>max</sub> (KBr, cm<sup>-1</sup>): 3065, 3032, 2959, 1714, 1639, 1579, 1450, 1311, 1171, 767; <sup>1</sup>H-NMR (CDCl<sub>3</sub>, 400 MHz): δ<sub>H</sub> 7.68 (1H; *d*; J = 16.0 Hz), 7.52–7.50 (2H; *m*), 7.37–7.35 (3H; *m*), 6.43 (1H; *d*; J = 16.0 Hz), 4.20 (2H; *t*; J = 6.8 Hz), 1.71 (2H; *q*; J = 6.8 Hz), 1.41–1.36 (4H; *m*), 0.93 (3H; J = 7.2 Hz); <sup>13</sup>C-NMR (CDCl<sub>3</sub>, 100 MHz): δ<sub>C</sub> 167.08 (C=O), 144.57 (C-7), 134.53 (C-1), 130.23 (C-4), 128.90 (C-3, C-5), 128.08 (C-2, C-6), 118.35 (C-8), 64.73 (C-1'), 28.49 (C-2'), 28.18 (C-3'), 22.41 (C-4'), 14.02 (C-5')<sup>[1,4,5]</sup>.

*Isopentyl cinnamate* (**8**): Yellow oil; Yield 76.1% (140.2 mg, 0.64 mmol); C<sub>14</sub>H<sub>18</sub>O<sub>2</sub>; 218.30 g/mol; TLC (hexane); R<sub>f</sub> = 0.2; IR ν<sub>max</sub> (KBr, cm<sup>-1</sup>): 3064, 3034, 2960, 1714, 1639, 1579, 1451, 1311, 1168, 767; <sup>1</sup>H-NMR (CDCl<sub>3</sub>, 400 MHz): δ<sub>H</sub> 7.68 (1H; *d*; J = 16.0 Hz), 7.53–7.51 (2H; *m*), 7.38–7.36 (3H; *m*), 6.44 (1H; *d*; J = 16.0 Hz), 4.24 (2H; *t*; J = 6.8 Hz), 1.80–1.70 (1H; *m*), 1.60 (2H; *q*; J = 6.8 Hz), 0.96 (3H; *d*; J = 6.4 Hz); <sup>13</sup>C-NMR (CDCl<sub>3</sub>, 100 MHz): δ<sub>C</sub> 167.24 (C=O), 144.62 (C-7), 134.65 (C-1), 130.22 (C-4), 129.02 (C-3, C-5), 128.16 (C-2, C-6), 118.33 (C-8), 63.32 (C-1'), 37.66 (C-2'), 25.20 (C-3'), 22.69 (C-4')<sup>[1]</sup>.

*Decyl cinnamate* (**9**): Yellow oil; Yield: 47.9% (105.9 mg); C<sub>19</sub>H<sub>28</sub>O<sub>2</sub>; 288.43 g/mol; TLC (9:1 Hex:AcOEt); R<sub>f</sub> = 0.52; IR ν<sub>max</sub> (KBr, cm<sup>-1</sup>): 3051, 3030, 2932, 1703, 1640, 1593, 1440, 1310, 1187; <sup>1</sup>H-NMR (CDCl<sub>3</sub>, 500 MHz): 7.68 (*d*, J = 16.0 Hz, 1H); 7.50 – 7.49 (*m*, 2H); 7.36 – 7.34 (*m*, 3H); 6.43 (*d*, J = 16.0 Hz); 4.19 (*t*, J = 7.0 Hz, 2H); 1.69 (*q*, J = 7.0 Hz, 2H); 1.42–1.37 (*m*, 2H); 1.36–1.27 (*m*, 12H), 0.88 (*t*, J = 7.0 Hz, 3H); <sup>13</sup>C-NMR (CDCl<sub>3</sub>, 125 MHz): δ<sub>C</sub> 167.03 (C=O), 144.54 (C-7), 134.51 (C-1), 130.19 (C-4), 128.85 (C-3, C-5), 128.05 (C-2, C-6), 118.32 (C-8), 64.71 (C-1'), 31.93 (C-2'), 29.58 (C-3'), 29.35 (C-4'), 29.35 (C-5'), 29.33 (C-6'), 28.78 (C-7'), 26.02 (C-8'), 22.71 (C-9'), 14.13 (C-10')<sup>[1]</sup>.

*Benzyl cinnamate* (**10**): Yellow oil; Yield 52.9% (85.1 mg, 0.36 mmol); C<sub>16</sub>H<sub>14</sub>O<sub>2</sub>; 238.29 g/mol; TLC (hexane); R<sub>f</sub> = 0.3; IR ν<sub>max</sub> (KBr, cm<sup>-1</sup>): 3066, 3032, 2921, 1717, 1637, 1578, 1450, 1309, 1163, 767; <sup>1</sup>H-NMR (CDCl<sub>3</sub>, 400 MHz): δ<sub>H</sub> 7.75 (*d*, J = 16.0 Hz, 1H); 7.54 – 7.53 (*m*, 2H); 7.43 – 7.38 (*m*, 8H, H-3, H-4, H-5, H-2', H-3', H-4', H-5', H-6'); 6.51 (*d*, J = 16.0 Hz, 1H); 5.27 (*s*, 2H); <sup>13</sup>C-NMR (CDCl<sub>3</sub>, 100 MHz): δ<sub>C</sub> 166.03 (C=O), 145.06 (C-7), 135.28 (C-1'), 132.74 (C-1), 130.60 (C-4), 129.97 (C-3, C-5), 128.94 (C-2, C-6), 128.49 (C-3', C-5'), 128.44 (C-2', C-4', C-6'), 117.72 (C-8), 64.83 (C-7')<sup>[1,4–6]</sup>.

*4-Methylbenzyl cinnamate* (**11**): White solid; Yield 63.8% (108.6 mg, 0.43 mmol); m.p.: 40–44°C<sup>[1]</sup>; C<sub>17</sub>H<sub>16</sub>O<sub>2</sub>; 252.30 g/mol; TLC (9:1 hexane/EtOAc); R<sub>f</sub> = 0.52; IR ν<sub>max</sub> (KBr, cm<sup>-1</sup>): 3051, 3027, 2922, 1704, 1640, 1574, 1448, 1310, 1187, 803, 768; <sup>1</sup>H-NMR (CDCl<sub>3</sub>, 400 MHz): δ<sub>H</sub> 7.76 (*d*, J = 16.0 Hz, 1H); 7.54 – 7.51 (*m*, 2H); 7.39 – 7.38 (*m*, 3H), 7.33 (*d*, J = 8.0 Hz, 2H), 7.21 (*d*, J = 8.0 Hz, 2H), 6.48 (*d*, J = 16.0 Hz, 1H), 5.32 (*s*, 2H), 2.38 (*s*, 3H); <sup>13</sup>C-NMR (CDCl<sub>3</sub>, 100 MHz): δ<sub>C</sub> 166.10 (C=O), 145.22 (C-7), 138.54 (C-4'), 134.24 (C-1), 133.46 (C-1'), 130.40 (C-4), 129.66 (C-3', C-5'), 129.02 (C-3, C-5), 128.61 (C-2', C-6'), 128.26 (C-2, C-6), 118.10 (C-8), 66.47 (C-7'), 21.75 (C-8')<sup>[1,2,5]</sup>.

*4-Hydroxybenzyl cinnamate* (**12**): Yellow oil; Yield 70.0% (110.6 mg); C<sub>16</sub>H<sub>14</sub>O<sub>3</sub>; 218.30 g/mol; TLC (7:3 hexane/EtOAc); R<sub>f</sub> = 0.2; IR ν<sub>max</sub> (KBr, cm<sup>-1</sup>): 3064, 3028, 2970, 1683, 1632, 1552, 1465, 1326; <sup>1</sup>H-NMR (CDCl<sub>3</sub>, 400 MHz): δ<sub>H</sub> 7.80 (1H; *d*; J = 16.0 Hz), 7.74–7.72 (2H; *m*), 7.67–7.63 (3H; *m*), 7.45 (2H; *d*; J = 8.0 Hz), 7.36–7.35 (2H; *m*), 6.65 (1H; *d*; J = 16.0 Hz), 5.19 (2H; *s*); <sup>13</sup>C-NMR (CDCl<sub>3</sub>, 100 MHz): δ<sub>C</sub> 167.35 (C=O), 156.16 (C-4'), 145.40 (C-7), 134.43 (C-1), 130.49 (C-4, C-2', C-6'), 129.01 (C-3, C-5), 128.24 (C-2, C-6), 128.09 (C-1'), 118.02 (C-8), 115.63 (C-3', C-5'), 66.49 (C-7')<sup>1,7</sup>.

*4-Nitrobenzyl cinnamate* (**13**): White crystal solid; Yield 62.0% (118.6 mg, 0.42 mmol); m.p.: 116–117°C<sup>[2]</sup>; C<sub>16</sub>H<sub>13</sub>NO<sub>2</sub>; 283.28 g/mol; TLC (9:1 hexane/EtOAc); R<sub>f</sub> = 0.28; IR ν<sub>max</sub> (KBr, cm<sup>-1</sup>): 3083, 3067, 2968, 1709, 1632, 1606, 1450, 1517, 1345, 1312, 1158, 859, 749; <sup>1</sup>H-NMR (DMSO-d<sub>6</sub>, 400 MHz): δ<sub>H</sub> 8.23–8.15 (*m*, 2H), 7.71 (1H; *s*), 7.70–7.62 (4H; *m*), 7.39–7.35 (3H; *m*), 6.68 (1H; *d*; J = 16.0 Hz), 5.32 (2H; *s*); <sup>13</sup>C-NMR (DMSO-d<sub>6</sub>, 100 MHz): δ<sub>C</sub> 165.93 (C=O), 147.11 (C-4'), 145.38 (C-7), 144.05 (C-1'), 133.91 (C-1), 130.68 (C-4), 128.96 (C-3, C-5), 128.58 (C-2, C-6)\*, 128.49 (C-2', C-6')\*, 123.64 (C-3', C-5'), 117.45 (C-8), 64.44 (C-7')<sup>[1,8]</sup>.

\* interchangeable

**4-Chlorobenzyl cinnamate (14):** White solid; Yield 43.1% (158.6 mg, 0.58 mmol); m.p.: 62–63°C [1]; C<sub>16</sub>H<sub>13</sub>ClO<sub>2</sub>; 272.73 g/mol; TLC (9:1 hexane/EtOAc); R<sub>f</sub> = 0.48; IR ν<sub>max</sub> (KBr, cm<sup>-1</sup>): 3065, 024, 2963, 1710, 1639, 1594, 1446, 1312, 1163, 1012, 801, 770; <sup>1</sup>H-NMR (CDCl<sub>3</sub>, 400 MHz): δ<sub>H</sub> 7.74 (1H; *d*; J = 16.0 Hz), 7.53–7.51 (2H; *m*), 7.39–7.38 (3H, *m*), 7.35 (4H; *s*), 6.48 (1H; *d*; J = 16.0 Hz), 5.21 (2H; *s*); <sup>13</sup>C-NMR (CDCl<sub>3</sub>, 100 MHz): δ<sub>C</sub> 166.78 (C=O), 145.57 (C-7), 134.72 (C-1), 134.39 (C-1'), 134.27 (C-4'), 130.57 (C-4), 129.77 (C-2', C-6'), 129.04 (C-3', C-5'), 128.91 (C-3, C-5), 128.26 (C-2, C-6), 117.74 (C-8), 65.62 (C-7') [1,3,9].

**Piperonyl cinnamate (15):** White oil; Yield 82.01% (170.9 mg); C<sub>17</sub>H<sub>14</sub>O<sub>4</sub>; 282.30 g/mol; TLC (9:1 hexane/EtOAc); R<sub>f</sub> = 0.37; IR ν<sub>max</sub> (KBr, cm<sup>-1</sup>): 3055, 3024, 2959, 1710, 1639, 1594, 1446, 1312, 1163; <sup>1</sup>H-NMR (DMSO-d<sub>6</sub>, 400 MHz): δ<sub>H</sub> 7.69–7.68 (*m*, 2H), 7.63 (*d*, J = 16.0 Hz, 1H), 7.39–7.36 (*m*, 3H), 6.97 (*sl*, 1H); 6.90–6.86 (*m*, 2H), 6.64 (*d*, J = 16.0 Hz, 1H), 5.99 (*s*, 2H), 5.08 (*s*, 2H); <sup>13</sup>C-NMR (DMSO-d<sub>6</sub>, 100 MHz): δ<sub>C</sub> 166.12 (C=O), 147.37 (C-3'), 147.19 (C-4'), 144.81 (C-7), 134.02 (C-1), 130.56 (C-4), 129.86 (C-1'), 128.95 (C-2, C-6), 128.44 (C-3, C-5), 122.31 (C-6'), 113 117.96 (C-8), 109.01 (C-2'), 108.19 (C-5'), 101.12 (C-8'), 65.68 (C-7') [1].

**Benzyl cinnamide (16):** Yellow solid; Yield 80.5% (110 mg); m.p.: 109–111°C [10]; C<sub>16</sub>H<sub>15</sub>NO; 237.30 g/mol; TLC (7:3 hexane/EtOAc); R<sub>f</sub> = 0.42; IR ν<sub>max</sub> (KBr, cm<sup>-1</sup>): 3261, 3029, 2926, 1653, 1616, 1497; <sup>1</sup>H-NMR (CDCl<sub>3</sub>, 500 MHz): δ<sub>H</sub> 7.75 (1H; *d*; J = 16.0 Hz), 7.54–7.50 (2H; *m*), 7.44–7.34 (8H; *m*), 6.50 (*d*, 1H, J = 16.0 Hz), 5.26 (2H; *s*); <sup>13</sup>C-NMR (CDCl<sub>3</sub>, 125 MHz): δ<sub>C</sub> 166.03 (C=O), 145.04 (C-7), 133.95 (C-1'), 132.74 (C-1), 130.64 (C-3, C-5), 129.97 (C-3', C-5'), 128.94 (C-2, C-6), 128.49 (C-4, C-4'), 128.44 (C-2', C-6'), 117.72 (C-8), 66.83 (C-7') [11,12].

**4-Chlorobenzyl cinnamide (17):** White solid; Yield 58.0% (94.7 mg); m.p.: 127–129°C [13]; C<sub>15</sub>H<sub>12</sub>ClNO; 283.28 g/mol; TLC (7:3 hexane/EtOAc); R<sub>f</sub> = 0.7; IR ν<sub>max</sub> (KBr, cm<sup>-1</sup>): 3259, 3083, 2921, 1655, 1621; 1489; <sup>1</sup>H-NMR (CDCl<sub>3</sub>, 500 MHz): 7.48 (*d*, H-7, J=15.5 Hz, H=1), 7.31–7.29 (*m*, H=2), 7.19–7.17 (*m*, H=3), 7.13–7.11 (*m*, H=2), 7.09–7.06 (*m*, H=2), 6.26 (*d*, J=15.5 Hz, H=1), 5.95 (*s*, H=1), 4.35 (*d*, J=6.0 Hz, H=2); <sup>13</sup>C-NMR (CDCl<sub>3</sub>, 125 MHz): δ<sub>C</sub> 166.02 (C=O), 141.84 (C-7), 136.92 (C-1'), 134.79 (C-4'), 133.49 (C-1), 129.96 (C-2', C-6'), 129.33 (C-3', C-5'), 128.98 (C-3, C-5), 128.98 (C-2, C-6), 127.95 (C-4), 120.30 (C-8), 43.23 (C-7') [9,14].

**4-Isopropylbenzyl cinnamide (18):** Yellow oil; Yield 57.3%; C<sub>19</sub>H<sub>21</sub>NO; 239.38 g/mol; TLC (7:3 hexane/EtOAc); R<sub>f</sub> = 0.53; IR ν<sub>max</sub> (KBr, cm<sup>-1</sup>): 3283, 3092, 2921, 2839, 1654, 1621, 1489. <sup>1</sup>H-NMR (CDCl<sub>3</sub>, 500 MHz): δ<sub>H</sub> 7.75 (*d*, J = 15.0 Hz, 1H), 7.37–7.33 (*m*, 2H), 7.29–7.27 (*m*, 7H), 6.65 (*d*, J = 15.0 Hz, 1H), 4.97 (*sept*, J = 6.5 Hz, 1H), 4.67–4.61 (*m*, 2H), 1.16 (*d*, J = 7.0 Hz, 6H); <sup>13</sup>C-NMR (CDCl<sub>3</sub>, 125 MHz): 167.27 (C=O), 142.99 (C-7), 139.03 (C-4'), 135.50 (C-1, C-1'), 129.57 (C-3, C-5), 128.80 (C-2, C-6), 127.90 (C-4, C-2', C-6'), 126.15 (C-3', C-5'), 119.07 (C-8), 46.33 (C-7'), 46.16 (C-8'), 20.45 (C-9') [11,13].

**Piperonyl cinnamide (19):** White oil; Yield 74.7%; C<sub>17</sub>H<sub>15</sub>NO<sub>3</sub>; 281.31 g/mol; TLC (7:3 hexane/EtOAc); R<sub>f</sub> = 0.57; IR ν<sub>max</sub> (KBr, cm<sup>-1</sup>): 3183, 2982, 2821, 1655, 1621, 1489; <sup>1</sup>H-NMR (DMSO-d<sub>6</sub>, 400 MHz): δ<sub>H</sub> 8.48 (*t*, J = 7.5 Hz, H=1); 7.48–7.45 (*m*, 2H), 7.38 (*d*, J = 16.0 Hz, 1H), 7.34–7.25 (*m*, 3H), 6.77–6.75 (*m*, 2H), 6.68 (*dd*, J = 8.0 Hz; 2.0 Hz, 1H), 6.59 (*d*, J = 16.0 Hz, 1H), 5.88 (*s*, 2H), 4.21 (*d*, J = 6.0 Hz, 2H). <sup>13</sup>C-NMR (DMSO-d<sub>6</sub>, 100 MHz): δ<sub>C</sub> 164.94 (C=O), 147.30 (C-4'), 146.15 (C-3'), 139.00 (C-7), 134.92 (C-1), 133.29 (C-1'), 129.51 (C-4), 129.40 (C-2, C-6), 127.57 (C-3, C-5), 122.52 (C-6'), 121.09 (C-8), 108.11 (C-2', C-5'), 100.87 (C-7'), 42.18 (C-8') [15].

**Dibenzyl cinnamide (20):** White solid; Yield 81.6% (121.2 mg); m.p.: 129–130°C [16]; C<sub>23</sub>H<sub>25</sub>NO<sub>3</sub>; 363.45 g/mol; TLC (7:3 hexane/EtOAc); R<sub>f</sub> = 0.48; IR ν<sub>max</sub> (KBr, cm<sup>-1</sup>): 3084, 2982, 1643, 1593, 1495. <sup>1</sup>H-NMR (CDCl<sub>3</sub>, 400 MHz): δ<sub>H</sub> 7.85 (*d*, J = 15.2 Hz, 1H), 7.45–7.42 (*m*, 2H), 7.36–7.27 (*m*, 11H), 7.22–7.20 (*m*, 2H), 6.90 (*d*, H-8, J = 15.2 Hz, 1H), 4.70 (*s*, 2H), 4.59 (*s*, 2H). <sup>13</sup>C-NMR (CDCl<sub>3</sub>, 400 MHz): δ<sub>C</sub> 167.36 (C=O), 143.97 (C-7), 137.46 (C-1'), 136.78 (C-1''), 135.31 (C-1), 129.97 (C-3', C-5'), 129.81 (C-3, C-5), 129.11 (C-2, C-6), 128.74 (C-3'', C-5''), 128.50 (C-2', C-6'), 129.81 (C-3'), 129.11 (C-5'), 128.74 (C-3'', C-5''), 127.99 (C-2'', C-6''), 127.84 (C-4), 126.71 (C-4''), 127.56 (C-4'), 117.39 (C-8), 50.20 (C-7'), 48.95 (C-7'') [15,16].

## 1.2. Molecular docking

**Table S1.** Results of docking compounds **6** and **18** to their probable targets in *C. albicans* and *S. aureus*.

| Target             | Pose | PLP   | Z_PLP | GS     | Z_GS  | CS    | Z_CS  | ASP   | Z_ASP | Aggregated Score |
|--------------------|------|-------|-------|--------|-------|-------|-------|-------|-------|------------------|
| <i>C. albicans</i> |      |       |       |        |       |       |       |       |       |                  |
| RHO2               | 1    | 71.91 | 3.01  | 27.36  | 0.73  | 24.28 | 2.49  | 19.65 | 1.27  | 1.87             |
|                    | 2    | 60.54 | 1.05  | 30.56  | 1.01  | 21.64 | 1.52  | 22.41 | 2.14  | 1.43             |
|                    | 3    | 62.48 | 1.39  | 26.97  | 0.69  | 21.21 | 1.36  | 18.02 | 0.76  | 1.05             |
| RHO1               | 1    | 71.48 | 2.58  | 30.14  | 0.84  | 20.49 | 1.33  | 19.76 | 1.13  | 1.47             |
|                    | 2    | 62.76 | 1.19  | 27.13  | 0.47  | 21.06 | 1.59  | 21.56 | 1.64  | 1.22             |
|                    | 3    | 61.77 | 1.03  | 37.09  | 1.71  | 20.00 | 1.10  | 19.07 | 0.93  | 1.19             |
| RHO3               | 1    | 51.88 | 1.40  | 23.06  | 1.95  | 17.56 | 0.91  | 14.27 | 1.12  | 1.35             |
|                    | 2    | 53.93 | 1.76  | 15.78  | 0.78  | 17.80 | 0.97  | 12.98 | 0.85  | 1.09             |
| AKR                | 1    | 47.04 | 1.22  | 12.46  | 1.03  | 21.49 | 1.65  | 29.27 | 1.82  | 1.43             |
| GCY1               | 1    | 42.72 | 0.18  | 8.85   | 1.26  | 16.08 | 1.31  | 23.79 | 1.33  | 1.02             |
| TMP1-Both          | 1    | 44.40 | 1.63  | 26.88  | 1.03  | 14.27 | -0.73 | 22.16 | 2.39  | 1.08             |
|                    | 2    | 45.95 | 2.26  | 29.16  | 1.25  | 16.60 | 0.51  | 18.18 | 0.29  | 1.07             |
| TMP1-UMP           | 1    | 51.26 | 2.06  | 20.96  | 0.32  | 11.16 | 0.65  | 17.58 | 0.37  | 0.85             |
| TMP1-Cof           | 1    | 60.42 | 1.53  | 27.43  | 1.19  | 23.54 | 1.14  | 33.79 | 3.49  | 1.84             |
|                    | 2    | 59.97 | 1.43  | 33.47  | 1.76  | 22.83 | 0.79  | 27.63 | 1.82  | 1.45             |
|                    | 3    | 63.83 | 2.30  | 12.84  | -0.19 | 23.54 | 1.14  | 26.10 | 1.41  | 1.16             |
|                    | 4    | 62.90 | 2.09  | 27.62  | 1.21  | 20.93 | -0.14 | 24.45 | 0.96  | 1.03             |
| TDH3               | 1    | 33.35 | 1.32  | 0.06   | -0.10 | 10.49 | 2.38  | 10.67 | 1.42  | 1.26             |
|                    | 2    | 34.33 | 1.7   | 14.42  | 1.09  | 8.61  | 1.26  | 9.57  | 0.95  | 1.25             |
| GRE3               | 1    | 44.93 | 1.38  | 19.45  | 1.24  | 13.61 | 1.87  | 19.18 | 1.44  | 1.48             |
|                    | 2    | 46.15 | 1.62  | 6.46   | 0.55  | 15.48 | 2.33  | 16.99 | 0.88  | 1.35             |
|                    | 3    | 43.77 | 1.15  | 9.34   | 0.7   | 12.53 | 1.61  | 17.85 | 1.1   | 1.14             |
| UGA11              | 1    | 55.78 | 1.77  | 15.07  | 0.77  | 19.41 | 1.13  | 25.73 | 1.99  | 1.42             |
|                    | 2    | 56.53 | 1.93  | 3.48   | 0.04  | 21.09 | 1.62  | 25.15 | 1.84  | 1.36             |
|                    | 3    | 55.75 | 1.77  | 9.21   | 0.4   | 22.22 | 1.95  | 22.85 | 1.23  | 1.34             |
| HOS2               | 1    | 66.22 | 1.77  | 26.47  | 0.76  | 25.33 | 2.06  | 29.1  | 1.88  | 1.62             |
|                    | 2    | 62.88 | 0.99  | 32.51  | 1.23  | 24.71 | 1.83  | 27.15 | 0.97  | 1.25             |
| UGA1               | 1    | 52.47 | 2.31  | 17.77  | 1.13  | 19.68 | 1.78  | 17.4  | -0.06 | 1.29             |
|                    | 2    | 46.35 | 0.58  | 18.39  | 1.21  | 19.23 | 1.62  | 21.6  | 1.06  | 1.12             |
| RPD3               | 1    | 64.83 | 4.04  | 43.1   | 2.61  | 21.1  | 2.2   | 26.76 | 1.84  | 2.67             |
|                    | 2    | 52.64 | 1.1   | 19.64  | 0.55  | 18.38 | 0.34  | 27.93 | 2.4   | 1.1              |
| IMA1               | 1    | 64.55 | 3.22  | 22.94  | 0.32  | 26.58 | 2.64  | 30.08 | 1.49  | 1.92             |
|                    | 2    | 58.95 | 2.15  | 36.19  | 1.95  | 23.99 | 1.75  | 28.42 | 1.11  | 1.74             |
|                    | 3    | 54.35 | 1.27  | 26.31  | 0.73  | 23.93 | 1.73  | 29.55 | 1.37  | 1.28             |
|                    | 4    | 54.72 | 1.35  | 32.38  | 1.48  | 23.06 | 1.43  | 26.67 | 0.7   | 1.24             |
| AAM                | 1    | 40.33 | 1.7   | -21.83 | -0.15 | 11.56 | 2     | 18.72 | 2.01  | 1.39             |
|                    | 2    | 38.15 | 1.25  | -0.16  | 0.81  | 10.8  | 1.82  | 13.74 | 1.08  | 1.24             |
|                    | 3    | 41.75 | 2     | -19.48 | -0.04 | 9.78  | 1.57  | 12.88 | 0.91  | 1.11             |
| LKH1               | 1    | 57.37 | 1.77  | 19.55  | 0.29  | 24.73 | 1.69  | 26.95 | 1.3   | 1.26             |
|                    | 2    | 57.35 | 1.76  | 32.51  | 1.31  | 21.21 | 0.61  | 24.87 | 0.75  | 1.11             |

|                  |   |       |      |         |       |       |      |       |       |      |
|------------------|---|-------|------|---------|-------|-------|------|-------|-------|------|
| TOP2             | 1 | 40.32 | 1.31 | 8.27    | 1.70  | 12.00 | 2.02 | -1.69 | -0.29 | 1.18 |
|                  | 2 | 44.52 | 2.14 | 6.22    | 1.63  | 6.09  | 0.70 | -0.41 | 0.05  | 1.13 |
|                  | 3 | 37.77 | 0.80 | 13.29   | 1.85  | 11.27 | 1.86 | -2.28 | -0.45 | 1.02 |
| <i>S. aureus</i> |   |       |      |         |       |       |      |       |       |      |
| ACPS             | 1 | 69.08 | 2.87 | 39.36   | 1.29  | 21.73 | 1.23 | 19.88 | 0.46  | 1.46 |
|                  | 2 | 56.51 | 0.26 | 44.63   | 1.66  | 24.74 | 2.34 | 19.82 | 0.43  | 1.17 |
| MENB             | 1 | 70.68 | 2.50 | 26.92   | -0.98 | 29.31 | 2.31 | 26.40 | 0.68  | 1.13 |
|                  | 2 | 67.27 | 1.11 | 44.13   | 1.62  | 27.25 | 1.12 | 25.82 | 0.36  | 1.05 |
| PPIASE-1         | 1 | 64.35 | 2.69 | 19.57   | 0.51  | 24.81 | 1.88 | 20.69 | -0.21 | 1.22 |
|                  | 2 | 63.94 | 2.62 | 0.23    | -1.63 | 23.63 | 1.41 | 26.54 | 1.67  | 1.02 |
| PPIASE-2         | 1 | 55.70 | 1.69 | 15.71   | 0.58  | 24.29 | 2.21 | 31.95 | 3.00  | 1.87 |
| GAR              | 1 | 62.95 | 1.58 | 10.82   | 0.51  | 26.03 | 1.50 | 32.66 | 1.29  | 1.22 |
|                  | 2 | 60.20 | 1.11 | 14.32   | 0.69  | 25.19 | 1.17 | 32.31 | 1.22  | 1.05 |
| ALDH             | 1 | 54.21 | 1.98 | 6.70    | 0.60  | 22.61 | 2.10 | 24.56 | 2.28  | 1.74 |
|                  | 2 | 50.15 | 1.11 | 14.31   | 1.13  | 21.44 | 1.69 | 20.24 | 0.93  | 1.21 |
| FABH             | 1 | 74.62 | 2.31 | 14.42   | 0.92  | 34.20 | 1.61 | 35.22 | 2.32  | 1.79 |
|                  | 2 | 68.12 | 0.88 | 12.70   | 0.83  | 33.74 | 1.42 | 31.88 | 1.09  | 1.06 |
| FLHA             | 1 | 49.49 | 1.37 | -48.13  | 0.78  | 11.41 | 1.47 | 12.48 | 1.59  | 1.30 |
|                  | 2 | 48.68 | 1.24 | -33.92  | 1.03  | 15.66 | 2.18 | 5.46  | 0.43  | 1.22 |
|                  | 3 | 51.48 | 1.68 | -72.44  | 0.33  | 9.50  | 1.15 | 10.77 | 1.30  | 1.12 |
| GBSA             | 1 | 38.58 | 1.64 | -93.97  | 0.26  | 8.62  | 1.47 | 10.47 | 1.57  | 1.23 |
|                  | 2 | 36.54 | 1.28 | -103.14 | 0.25  | 10.13 | 1.66 | 7.90  | 1.19  | 1.09 |
| PPTHL            | 1 | 55.63 | 0.76 | 29.66   | 1.27  | 23.05 | 1.80 | 24.44 | 0.23  | 1.02 |

**Table S2.** Predicted free energies of binding and their components for the predicted complexes of compounds **6** and **18** with their potential targets in *C. albicans* and *S. aureus*.

| Target      | Conformer | MM-PBSA Component |        |       |         |         |             |              | DELTA TOTAL |
|-------------|-----------|-------------------|--------|-------|---------|---------|-------------|--------------|-------------|
|             |           | VD WAALS          | EEL    | EPB   | ENPOLAR | EDISPER | DELTA G gas | DELTA G solv |             |
| C. albicans |           |                   |        |       |         |         |             |              |             |
| RHO2        | 1         | -31.48            | -11.91 | 30.49 | -22.91  | 36.09   | -43.39      | 43.67        | 0.28        |
|             | 2         | -23.99            | -9.86  | 24.64 | -17.72  | 29.50   | -33.85      | 36.42        | 2.57        |
|             | 3         | -33.95            | -13.83 | 35.48 | -23.94  | 37.34   | -47.77      | 48.88        | 1.11        |
| RHO1        | 1         | -33.02            | -12.67 | 32.02 | -23.87  | 37.45   | -45.69      | 45.60        | -0.09       |
|             | 2         | -25.61            | -7.22  | 22.96 | -20.57  | 32.37   | -32.83      | 34.77        | 1.94        |
|             | 3         | -25.39            | -2.39  | 20.45 | -20.12  | 32.29   | -27.78      | 32.62        | 4.84        |
| RHO3        | 1         | -28.29            | -3.37  | 15.52 | -21.82  | 33.18   | -31.67      | 26.88        | -4.79       |
|             | 2         | -25.95            | -3.25  | 22.13 | -20.13  | 31.21   | -29.19      | 33.22        | 4.02        |
| AKR         | 1         | -25.07            | -6.59  | 19.82 | -19.33  | 32.37   | -31.66      | 32.86        | 1.20        |
| GCY1        | 1         | -26.92            | -9.29  | 26.75 | -21.10  | 34.51   | -36.21      | 40.16        | 3.95        |
| TMP1-Both   | 1         | -31.22            | -9.47  | 33.70 | -24.08  | 40.29   | -40.69      | 49.91        | 9.23        |
|             | 2         | -31.28            | -14.18 | 35.13 | -24.56  | 40.20   | -45.47      | 50.78        | 5.31        |
| TMP1-UMP    | 1         | -35.38            | -19.25 | 43.94 | -25.03  | 40.07   | -54.63      | 58.98        | 4.34        |
| TMP1-Cof    | 1         | -38.32            | -15.10 | 35.89 | -26.90  | 45.01   | -53.42      | 54.00        | 0.59        |
|             | 2         | -36.36            | -10.23 | 36.33 | -26.68  | 43.28   | -46.59      | 52.94        | 6.35        |

|                  |   |        |        |       |        |       |        |       |        |
|------------------|---|--------|--------|-------|--------|-------|--------|-------|--------|
|                  | 3 | -38.94 | -12.99 | 42.89 | -27.27 | 44.08 | -51.92 | 59.70 | 7.78   |
|                  | 4 | -38.20 | -8.80  | 38.14 | -26.67 | 43.13 | -47.00 | 54.59 | 7.59   |
| TDH3             | 1 | -28.13 | -6.80  | 25.80 | -21.08 | 34.83 | -34.92 | 39.54 | 4.62   |
|                  | 2 | -24.65 | -4.87  | 21.40 | -19.08 | 31.54 | -29.52 | 33.86 | 4.34   |
| GRE3             | 1 | -31.10 | -1.33  | 16.71 | -23.77 | 38.09 | -32.43 | 31.03 | -1.41  |
|                  | 2 | -23.58 | -1.33  | 13.37 | -18.73 | 30.02 | -24.90 | 24.66 | -0.24  |
| HOS2             | 3 | -19.80 | -2.50  | 15.96 | -15.43 | 27.31 | -22.29 | 27.83 | 5.54   |
|                  | 1 | -28.42 | -44.17 | 46.41 | -25.34 | 38.90 | -72.59 | 59.96 | -12.63 |
| RPD3             | 2 | -24.47 | -59.05 | 50.43 | -25.35 | 38.31 | -83.52 | 63.39 | -20.14 |
|                  | 1 | -27.51 | -49.84 | 44.64 | -25.73 | 39.03 | -77.35 | 57.95 | -19.40 |
| IMA1             | 2 | -28.47 | -2.17  | 24.62 | -21.42 | 35.36 | -30.64 | 38.56 | 7.93   |
|                  | 1 | -36.75 | -0.81  | 27.98 | -25.76 | 43.20 | -37.57 | 45.42 | 7.85   |
| AAM              | 2 | -35.32 | -10.28 | 35.49 | -25.85 | 43.00 | -45.60 | 52.65 | 7.05   |
|                  | 3 | -34.14 | -10.14 | 49.52 | -25.96 | 43.30 | -44.28 | 66.85 | 22.57  |
| LKH1             | 4 | -35.28 | -5.90  | 36.01 | -25.52 | 44.06 | -41.19 | 54.55 | 13.36  |
|                  | 1 | -34.27 | -8.21  | 36.07 | -25.56 | 42.28 | -42.48 | 52.78 | 10.30  |
| TOP2             | 2 | -35.55 | -11.79 | 34.91 | -26.16 | 44.24 | -47.35 | 52.99 | 5.64   |
|                  | 3 | -35.62 | -1.34  | 17.78 | -20.03 | 39.41 | -36.96 | 37.16 | 0.21   |
| ACPS             | 1 | -26.71 | -14.98 | 41.84 | -21.73 | 39.12 | -41.69 | 59.23 | 17.54  |
|                  | 2 | -31.51 | -16.64 | 52.42 | -23.20 | 41.41 | -48.16 | 70.62 | 22.47  |
| MENB             | 1 | -40.23 | -8.04  | 39.31 | -26.89 | 45.05 | -48.27 | 57.46 | 9.20   |
|                  | 2 | -40.19 | -18.08 | 47.59 | -27.02 | 45.44 | -58.27 | 66.01 | 7.74   |
|                  | 3 | -40.95 | -20.53 | 55.16 | -27.44 | 46.51 | -61.47 | 74.22 | 12.75  |
| <i>S. aureus</i> |   |        |        |       |        |       |        |       |        |
| PPIASE-1         | 1 | -24.99 | -10.76 | 28.02 | -20.00 | 35.46 | -35.75 | 43.48 | 7.73   |
|                  | 2 | -24.50 | -10.28 | 27.44 | -19.77 | 33.41 | -34.78 | 41.07 | 6.30   |
| PPIASE-2         | 1 | -43.29 | -14.01 | 38.41 | -31.60 | 54.07 | -57.30 | 60.88 | 3.58   |
|                  | 2 | -43.11 | -20.70 | 41.81 | -31.55 | 54.07 | -63.81 | 64.32 | 0.52   |
| GAR              | 1 | -26.19 | -9.17  | 20.30 | -21.16 | 33.81 | -35.36 | 32.96 | -2.40  |
|                  | 2 | -21.40 | -4.08  | 14.81 | -17.96 | 29.42 | -25.48 | 26.26 | 0.78   |
| ALDH             | 1 | -24.28 | -9.12  | 19.62 | -18.89 | 32.46 | -33.40 | 33.18 | -0.22  |
|                  | 2 | -30.17 | -19.02 | 34.17 | -23.82 | 37.65 | -49.20 | 48.00 | -1.20  |
| FABH             | 2 | -25.07 | -11.21 | 25.91 | -19.74 | 34.69 | -36.28 | 40.86 | 4.58   |
|                  | 1 | -23.47 | -13.43 | 26.75 | -18.28 | 30.40 | -36.89 | 38.86 | 1.97   |
| FLHA             | 2 | -17.78 | -7.19  | 19.01 | -14.26 | 24.46 | -24.97 | 29.20 | 4.23   |
|                  | 1 | -48.12 | -14.31 | 31.94 | -33.66 | 55.69 | -62.43 | 53.96 | -8.47  |
| GBSA             | 2 | -45.35 | -18.55 | 38.89 | -33.27 | 56.01 | -63.89 | 61.63 | -2.27  |
|                  | 1 | -45.75 | -25.67 | 50.10 | -31.67 | 52.52 | -71.42 | 70.95 | -0.47  |
| PPTH             | 2 | -32.57 | -11.21 | 28.85 | -23.93 | 41.91 | -43.78 | 46.83 | 3.05   |
|                  | 3 | -40.54 | -8.35  | 32.99 | -29.33 | 49.33 | -48.89 | 52.99 | 4.11   |
| PPTH             | 1 | -35.40 | -16.34 | 38.51 | -27.05 | 45.89 | -51.73 | 57.35 | 5.62   |
|                  | 2 | -29.89 | -3.12  | 29.44 | -21.69 | 40.98 | -33.01 | 48.72 | 15.71  |
| PPTH             | 1 | -36.61 | -16.75 | 39.38 | -28.21 | 44.92 | -53.36 | 56.09 | 2.73   |

## References

1. Araújo, M. O., Pérez-Castillo, Y., Oliveira, L. H. G., Nunes, F. C. & Sousa, D. P. d. Larvicidal Activity of Cinnamic Acid Derivatives: Investigating Alternative Products for *Aedes aegypti* L. Control. *Molecule*, **2021**, 26, 61.
2. Iranpoor, N., Firouzabadi, H., Riaz, A. & Pedrão, K. Regioselective hydrocarbonylation of phenylacetylene to  $\alpha,\beta$ -unsaturated esters and thioesters with  $\text{Fe}(\text{CO})_5$  and  $\text{Mo}(\text{CO})_6$ . *J. Organomet. Chem.* **2016**, 822, 67–73.
3. Lutjen, A. B., Quirk, M. A., Barbera, A. M. & Kolonko, E. M. Synthesis of (E)-cinnamyl ester derivatives via a greener Steglich esterification. *Bioorg. Med. Chem.* **2018**, 26, 5291–5298.
4. Lima, T. C.; Ferreira, A. R.; Silva, D. F.; Lima, E. O.; de Sousa, D. P. Antifungal Activity of Cinnamic Acid and Benzoic Acid Esters against *Candida Albicans* Strains. **2017**, 32, 572–575.
5. Jakovetić, S. *et al.* Synthesis of Aliphatic Esters of Cinnamic Acid as Potential Lipophilic Antioxidants Catalyzed by Lipase B from *Candida antarctica*. *Appl. Biochem. Biotechnol.* **2013**, 170, 1560–1573.
6. Sova, M. . *et al.* Flavonoids and cinnamic acid esters as inhibitors of fungal 17 $\beta$ -hydroxysteroid dehydrogenase: A synthesis, QSAR and modelling study. *Bioorg. Med. Chem.* **2006**, 14, 7404–7418.
7. Sova, M. Antioxidant and antimicrobial activities of cinnamic acid derivatives. *Mini Rev. Med. Chem.* **2012**, 12, 749–767.
8. Bisogno, F. *et al.* Structure-antifungal activity relationship of cinnamic acid derivatives. *J. Agric. Food Chem.* **2007**, 55, 10635–10640.
9. Silva, R. H. N. *et al.* Antimicrobial Activity of 4-Chlorocinnamic Acid Derivatives. *Biomed. Res. Int.* **2019**, 2019, 3941242.
10. Saito, Y., Ouchi, H. & Takahata, H. Carboxamidation of carboxylic acids with 1-tert-butoxy-2-tert-butoxycarbonyl-1,2-dihydroisoquinoline (BBDI) without bases. *Tetrahedron.* **2008**, 64, 11129–11135.
11. Allen, C. L., Chhatwal, A. R. & Williams, J. M. J. Direct amide formation from unactivated carboxylic acids and amines. *Chem. Commun.* **2011**, 48, 666–668.
12. Martínez-Soriano, P. A. *et al.* Solvent-Free Synthesis of Carboxylic Acids and Amide Analogs of CAPE (Caffeic Acid Phenethyl Ester) under Infrared Irradiation Conditions. **2015**, 5, 81–91.
13. Barajas, J. G. H., Méndez, L. Y. V., Kouznetsov, V. V. & Stashenko, E. E. Efficient synthesis of new N-benzyl- or N-(2-furylmethyl)cinnamamides promoted by the 'green' catalyst boric acid, and their spectral analysis. *Synthesis* **2008**, 3, 0377–0382.
14. Perez-Castillo, Y. *et al.* Antifungal activity of n-(4-halobenzyl)amides against *Candida* spp. and molecular modeling studies. *Int. J. Mol. Sci.* **2022**, 23, 419.
15. Khaldoun, K. *et al.* An Efficient Solvent-Free Microwave-Assisted Synthesis of Cinnamamides by Amidation Reaction Using Phenylboronic Acid/Lewis Base Co-catalytic System. *Synth. J. Synth. Org. Chem.* **2019**, 51, 3891–3900.
16. Yasui, Y., Tsuchida, S., Miyabe, H. & Takemoto, Y. One-pot amidation of olefins through Pd-catalyzed coupling of alkylboranes and carbamoyl chlorides. *J. Org. Chem.* **2007**, 72, 5898–5900.
